# Supplementary material for: Disparities in Risks of Malaria Associated with Climatic Variability among Women, Children and Elderly in the Chittagong Hill Tracts of Bangladesh
Source: PubMed Central journal article supplement (PMC7766360; doi:10.3390/ijerph17249469), 2020-12-17
Supplement: ijerph-17-09469-s001.pdf [file ijerph-17-09469-s001.pdf]

Supplementary Materials:

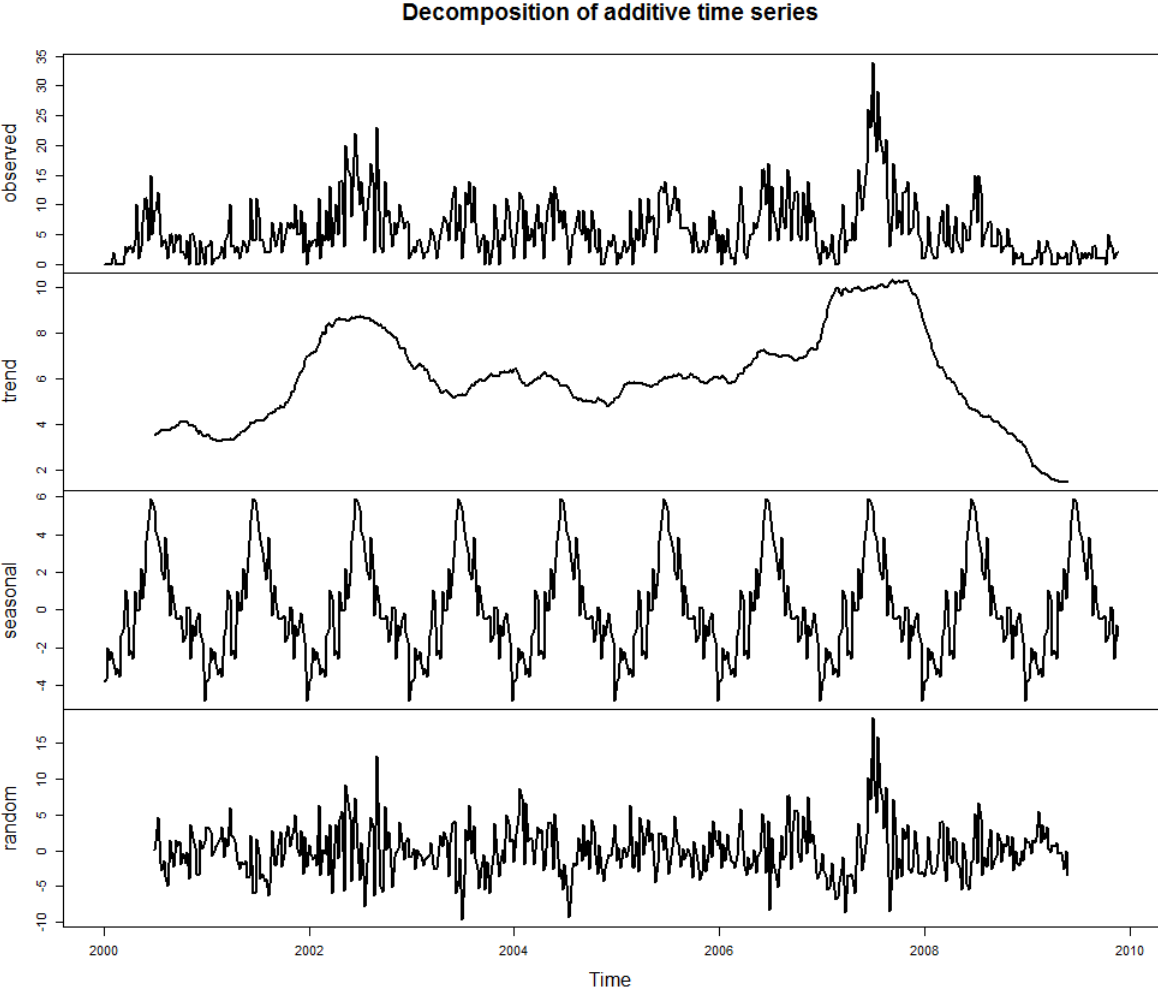

Figure S1. Decomposition of the malaria data.

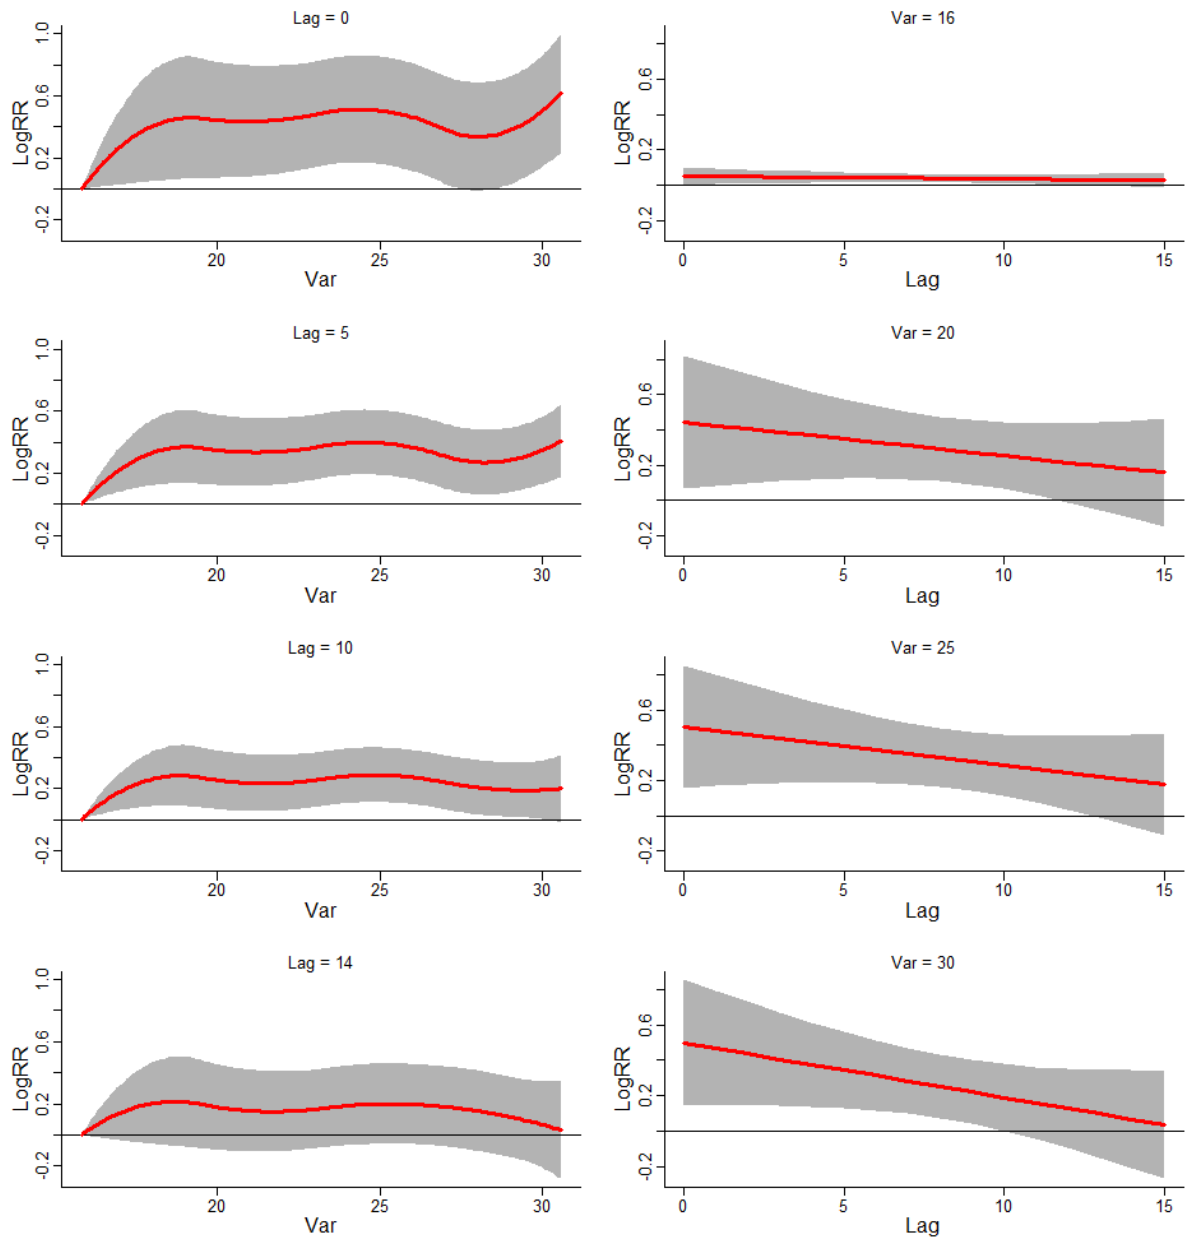

**Figure S2.** Lag (in weeks) specific associations (outcomes=logRR) for various temperature values (var).

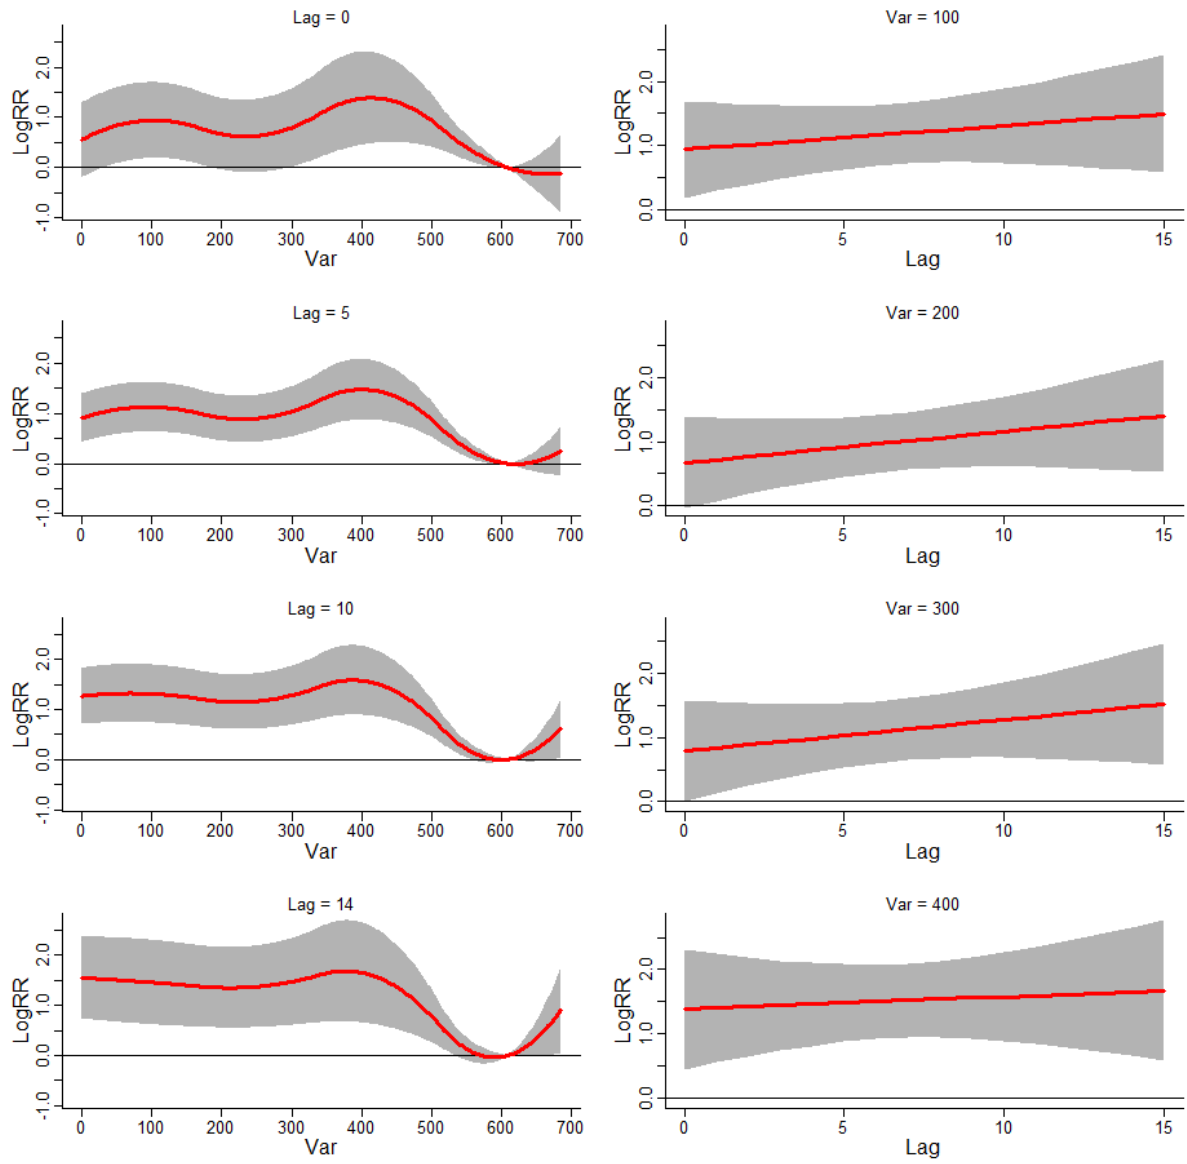

**Figure S3.** Lag specific associations for various rainfall values (var).

**Table S1.** Selection of the best model, exploring various exposure-response and lag-response functions and degrees of freedom 3-5 at maximum lag 15.

|          | <b>Temperature<br/>-Response</b> | <b>Rainfall<br/>-Response</b> | <b>Lag-Response</b> | <b>Total df</b> | <b>QAIC</b> |
|----------|----------------------------------|-------------------------------|---------------------|-----------------|-------------|
| Model 1  | Linear                           | Linear                        | strata              | 1               | 3317.5      |
| Model 2  | Quadratic B-spline               | Linear                        | strata              | 3               | 3279.5      |
| Model 3  | Quadratic B-spline               | Linear                        | strata              | 4               | 3286        |
| Model 4  | Quadratic B-spline               | Linear                        | strata              | 5               | 3284.1      |
| Model 5  | Linear                           | Linear                        | Linear              | 2               | 3317.7      |
| Model 6  | Quadratic B-spline               | Linear                        | Linear              | 6               | 3258.9      |
| Model 7  | Quadratic B-spline               | Linear                        | Linear              | 8               | 3266.1      |
| Model 8  | Quadratic B-spline               | Linear                        | Linear              | 10              | 3271.1      |
| Model 9  | Linear                           | Linear                        | Natural spline      | 5               | 3325        |
| Model 10 | Quadratic B-spline               | Linear                        | Natural spline      | 15              | 3267.1      |
| Model 11 | Quadratic B-spline               | Linear                        | Natural spline      | 20              | 3294.4      |
| Model 12 | Quadratic B-spline               | Linear                        | Natural spline      | 25              | 3306.7      |
| Model 13 | Linear                           | Linear                        | Quadratic B-spline  | 5               | 3328.4      |
| Model 14 | Quadratic B-spline               | Linear                        | Quadratic B-spline  | 15              | 3269.4      |
| Model 15 | Quadratic B-spline               | Linear                        | Quadratic B-spline  | 20              | 3297.2      |
| Model 16 | Quadratic B-spline               | Linear                        | Quadratic B-spline  | 25              | 3310.6      |
| Model 17 | Linear                           | Quadratic B-spline            | strata              | 1               | 3291.8      |
| Model 18 | Quadratic B-spline               | Quadratic B-spline            | strata              | 3               | 3267.6      |
| Model 19 | Quadratic B-spline               | Quadratic B-spline            | strata              | 4               | 3269.1      |
| Model 20 | Quadratic B-spline               | Quadratic B-spline            | strata              | 5               | 3256.4      |
| Model 21 | Linear                           | Quadratic B-spline            | Linear              | 2               | 3287.6      |
| Model 22 | Quadratic B-spline               | Quadratic B-spline            | Linear              | 6               | 3238.6      |
| Model 23 | Quadratic B-spline               | Quadratic B-spline            | Linear              | 8               | 3235.4      |
| Model 24 | Quadratic B-spline               | Quadratic B-spline            | Linear              | 10              | 3233.7      |
| Model 25 | Linear                           | Quadratic B-spline            | Natural spline      | 5               | 3265.4      |
| Model 26 | Quadratic B-spline               | Quadratic B-spline            | Natural spline      | 15              | 3225.2      |
| Model 27 | Quadratic B-spline               | Quadratic B-spline            | Natural spline      | 20              | 3240.4      |
| Model 28 | Quadratic B-spline               | Quadratic B-spline            | Natural spline      | 25              | 3250.1      |
| Model 29 | Linear                           | Quadratic B-spline            | Quadratic B-spline  | 5               | 3264.8      |
| Model 30 | Quadratic B-spline               | Quadratic B-spline            | Quadratic B-spline  | 15              | 3222.2      |
| Model 31 | Quadratic B-spline               | Quadratic B-spline            | Quadratic B-spline  | 20              | 3239.3      |
| Model 32 | Quadratic B-spline               | Quadratic B-spline            | Quadratic B-spline  | 25              | 3251.4      |
| Model 33 | Linear                           | Quadratic B-spline            | strata              | 1               | 3297.9      |
| Model 34 | Quadratic B-spline               | Quadratic B-spline            | strata              | 3               | 3276.2      |
| Model 35 | Quadratic B-spline               | Quadratic B-spline            | strata              | 4               | 3276.9      |
| Model 36 | Quadratic B-spline               | Quadratic B-spline            | strata              | 5               | 3262.1      |
| Model 37 | Linear                           | Quadratic B-spline            | Linear              | 2               | 3263.9      |
| Model 38 | Quadratic B-spline               | Quadratic B-spline            | Linear              | 6               | 3218.4      |
| Model 39 | Quadratic B-spline               | Quadratic B-spline            | Linear              | 8               | 3210.4      |

|                 |                           |                           |                    |           |               |
|-----------------|---------------------------|---------------------------|--------------------|-----------|---------------|
| Model 40        | Quadratic B-spline        | Quadratic B-spline        | Linear             | 10        | 3199.5        |
| Model 41        | Linear                    | Quadratic B-spline        | Natural spline     | 5         | 3254.2        |
| Model 42        | Quadratic B-spline        | Quadratic B-spline        | Natural spline     | 15        | 3216          |
| Model 43        | Quadratic B-spline        | Quadratic B-spline        | Natural spline     | 20        | 3227.8        |
| Model 44        | Quadratic B-spline        | Quadratic B-spline        | Natural spline     | 25        | 3228.6        |
| Model 45        | Linear                    | Quadratic B-spline        | Quadratic B-spline | 5         | 3261          |
| Model 46        | Quadratic B-spline        | Quadratic B-spline        | Quadratic B-spline | 15        | 3221.1        |
| Model 47        | Quadratic B-spline        | Quadratic B-spline        | Quadratic B-spline | 20        | 3234          |
| Model 48        | Quadratic B-spline        | Quadratic B-spline        | Quadratic B-spline | 25        | 3242.1        |
| Model 49        | Linear                    | Quadratic B-spline        | strata             | 1         | 3187.6        |
| Model 50        | Quadratic B-spline        | Quadratic B-spline        | strata             | 3         | 3177.5        |
| Model 51        | Quadratic B-spline        | Quadratic B-spline        | strata             | 4         | 3176.5        |
| Model 52        | Quadratic B-spline        | Quadratic B-spline        | strata             | 5         | 3155.6        |
| Model 53        | Linear                    | Quadratic B-spline        | Linear             | 2         | 3167.3        |
| Model 54        | Quadratic B-spline        | Quadratic B-spline        | Linear             | 6         | 3135.8        |
| Model 55        | Quadratic B-spline        | Quadratic B-spline        | Linear             | 8         | 3129.3        |
| <b>Model 56</b> | <b>Quadratic B-spline</b> | <b>Quadratic B-spline</b> | <b>Linear</b>      | <b>10</b> | <b>3110.7</b> |
| Model 57        | Linear                    | Quadratic B-spline        | Natural spline     | 5         | 3166.6        |
| Model 58        | Quadratic B-spline        | Quadratic B-spline        | Natural spline     | 15        | 3138.5        |
| Model 59        | Quadratic B-spline        | Quadratic B-spline        | Natural spline     | 20        | 3151          |
| Model 60        | Quadratic B-spline        | Quadratic B-spline        | Natural spline     | 25        | 3145.2        |
| Model 61        | Linear                    | Quadratic B-spline        | Quadratic B-spline | 5         | 3190.6        |
| Model 62        | Quadratic B-spline        | Quadratic B-spline        | Quadratic B-spline | 15        | 3160.7        |
| Model 63        | Quadratic B-spline        | Quadratic B-spline        | Quadratic B-spline | 20        | 3175.2        |
| Model 64        | Quadratic B-spline        | Quadratic B-spline        | Quadratic B-spline | 25        | 3173.5        |
